# Supplementary material for: Analysis of individual cells identifies cell‐to‐cell variability following induction of cellular senescence
Source: PubMed Central journal article supplement (PMC5595671; doi:10.1111/acel.12632), 2017-07-11
Supplement: ACEL-16-1043-s001.pdf [file ACEL-16-1043-s001.pdf]

## SUPPORTING INFORMATION

**Figure S1. Experimental design and quality control.** (A) Schematic representation of the experimental design showing time points for generating the datasets and assays to confirm quiescence and senescence. Purple indicates quiescent cells treated with vehicle (PBS), whereas red indicates senescent cells treated with bleomycin. (B-C) Quality control assays confirming the induction of senescence. (B) Senescence-associated beta galactosidase (SA-B-gal) and EdU incorporation analysis of quiescent (PBS-treated) and senescent (bleomycin-treated) samples. (C) IL-6 ELISA confirming establishment of a SASP in senescent cells.

**Figure S2. Detection of gene transcripts varies by method and cell type.** (A) Rank ordered success rates by gene for all samples in our data sets. (B) Success rates by gene for C1 vs MI methods. (C) Success rates by gene for either senescent (SEN) or quiescent (QUI) cell populations.

**Figure S3. Normalization of datasets.** Density maps for gene expression analyzed by C1 or MI before (A) and after (B) normalization.

**Figure S4. Examples of genes with strong positive or negative correlations.** Relative gene expression values for each single cell were plotted against each other. Each axis indicates gene expression values for each single cell; red dots indicate senescent cells, blue dots indicate quiescent cells. (A) Example of a strong positive correlation: GAPDH plotted against vimentin. (B) Example of a strong negative correlation: AGER plotted against GAPDH.

**Figure S5. Pathway analysis of Class 1 and Class 2 genes.** Pathway enrichment analysis of Class 1 (above) and Class 2 (below) genes, sorted by p-value.

# Figure S1

## A

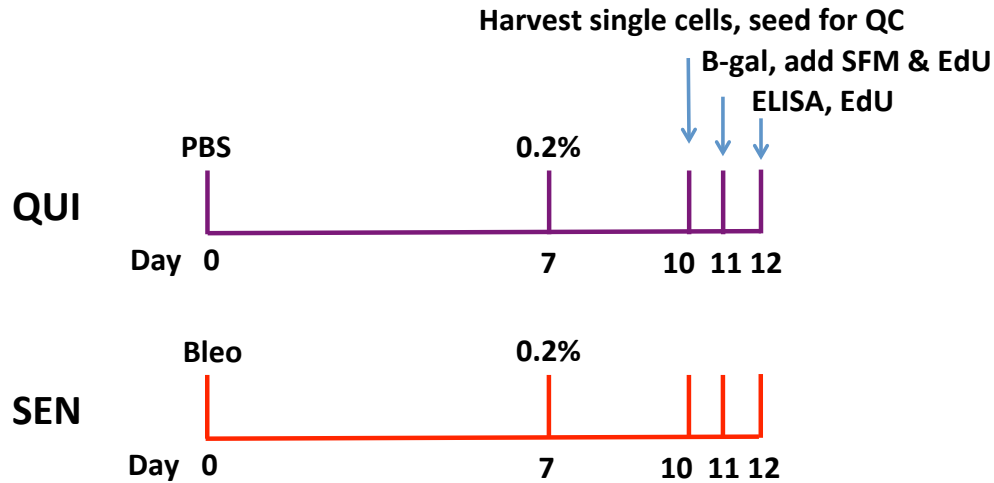

## B

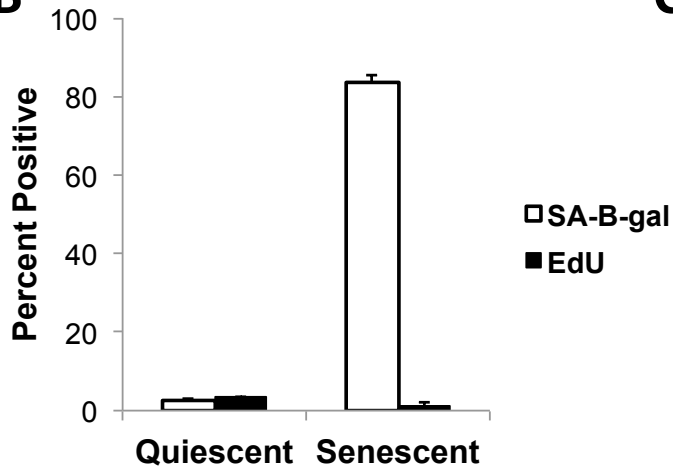

## C

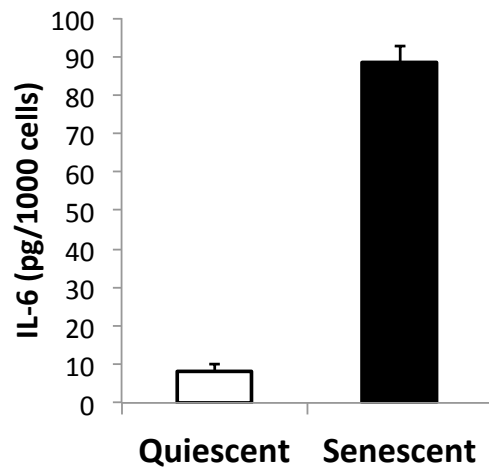

# Figure S2

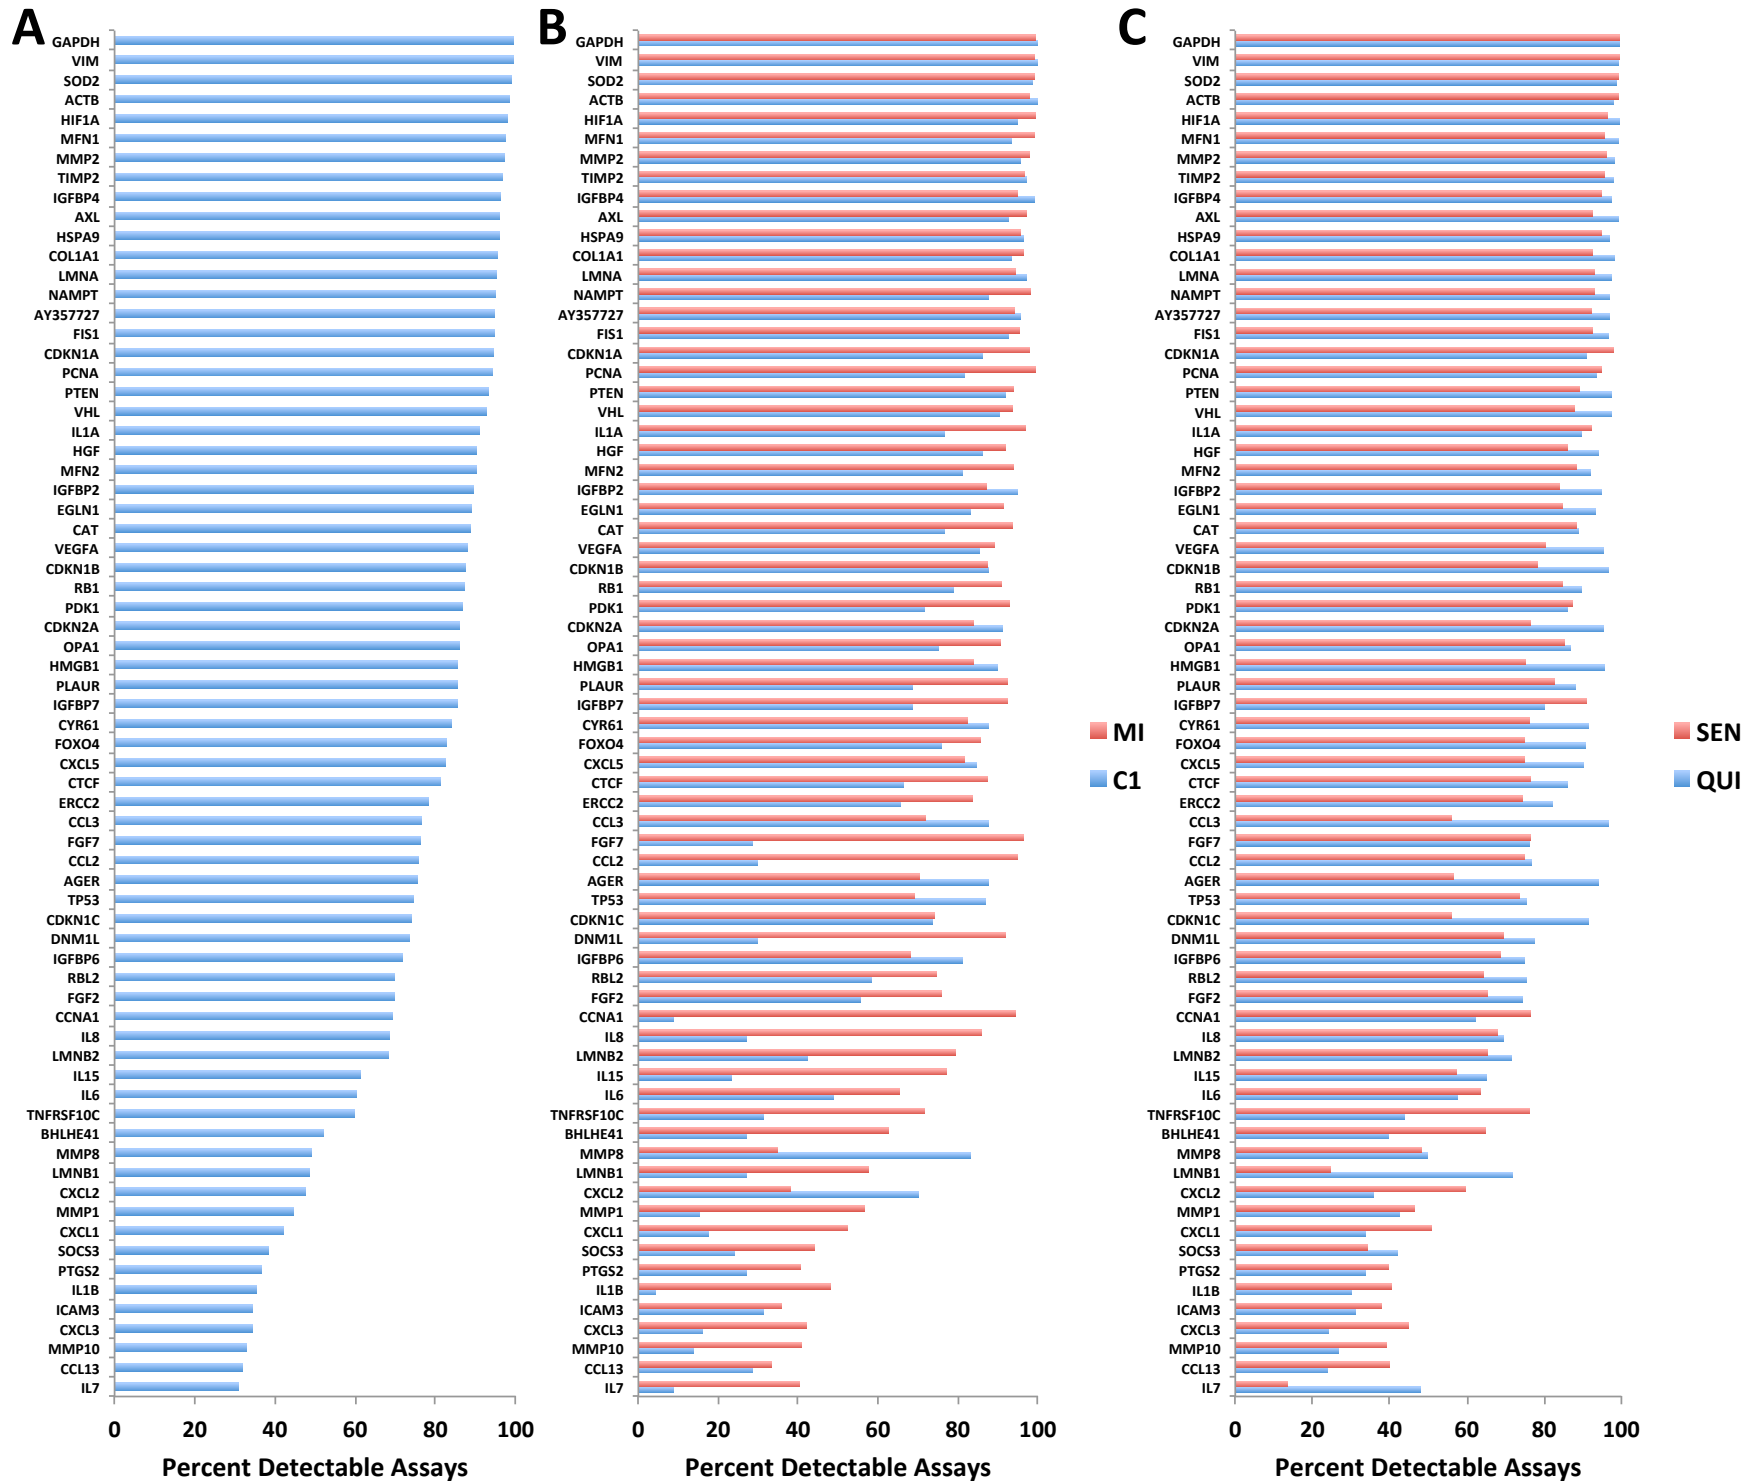

# Figure S3

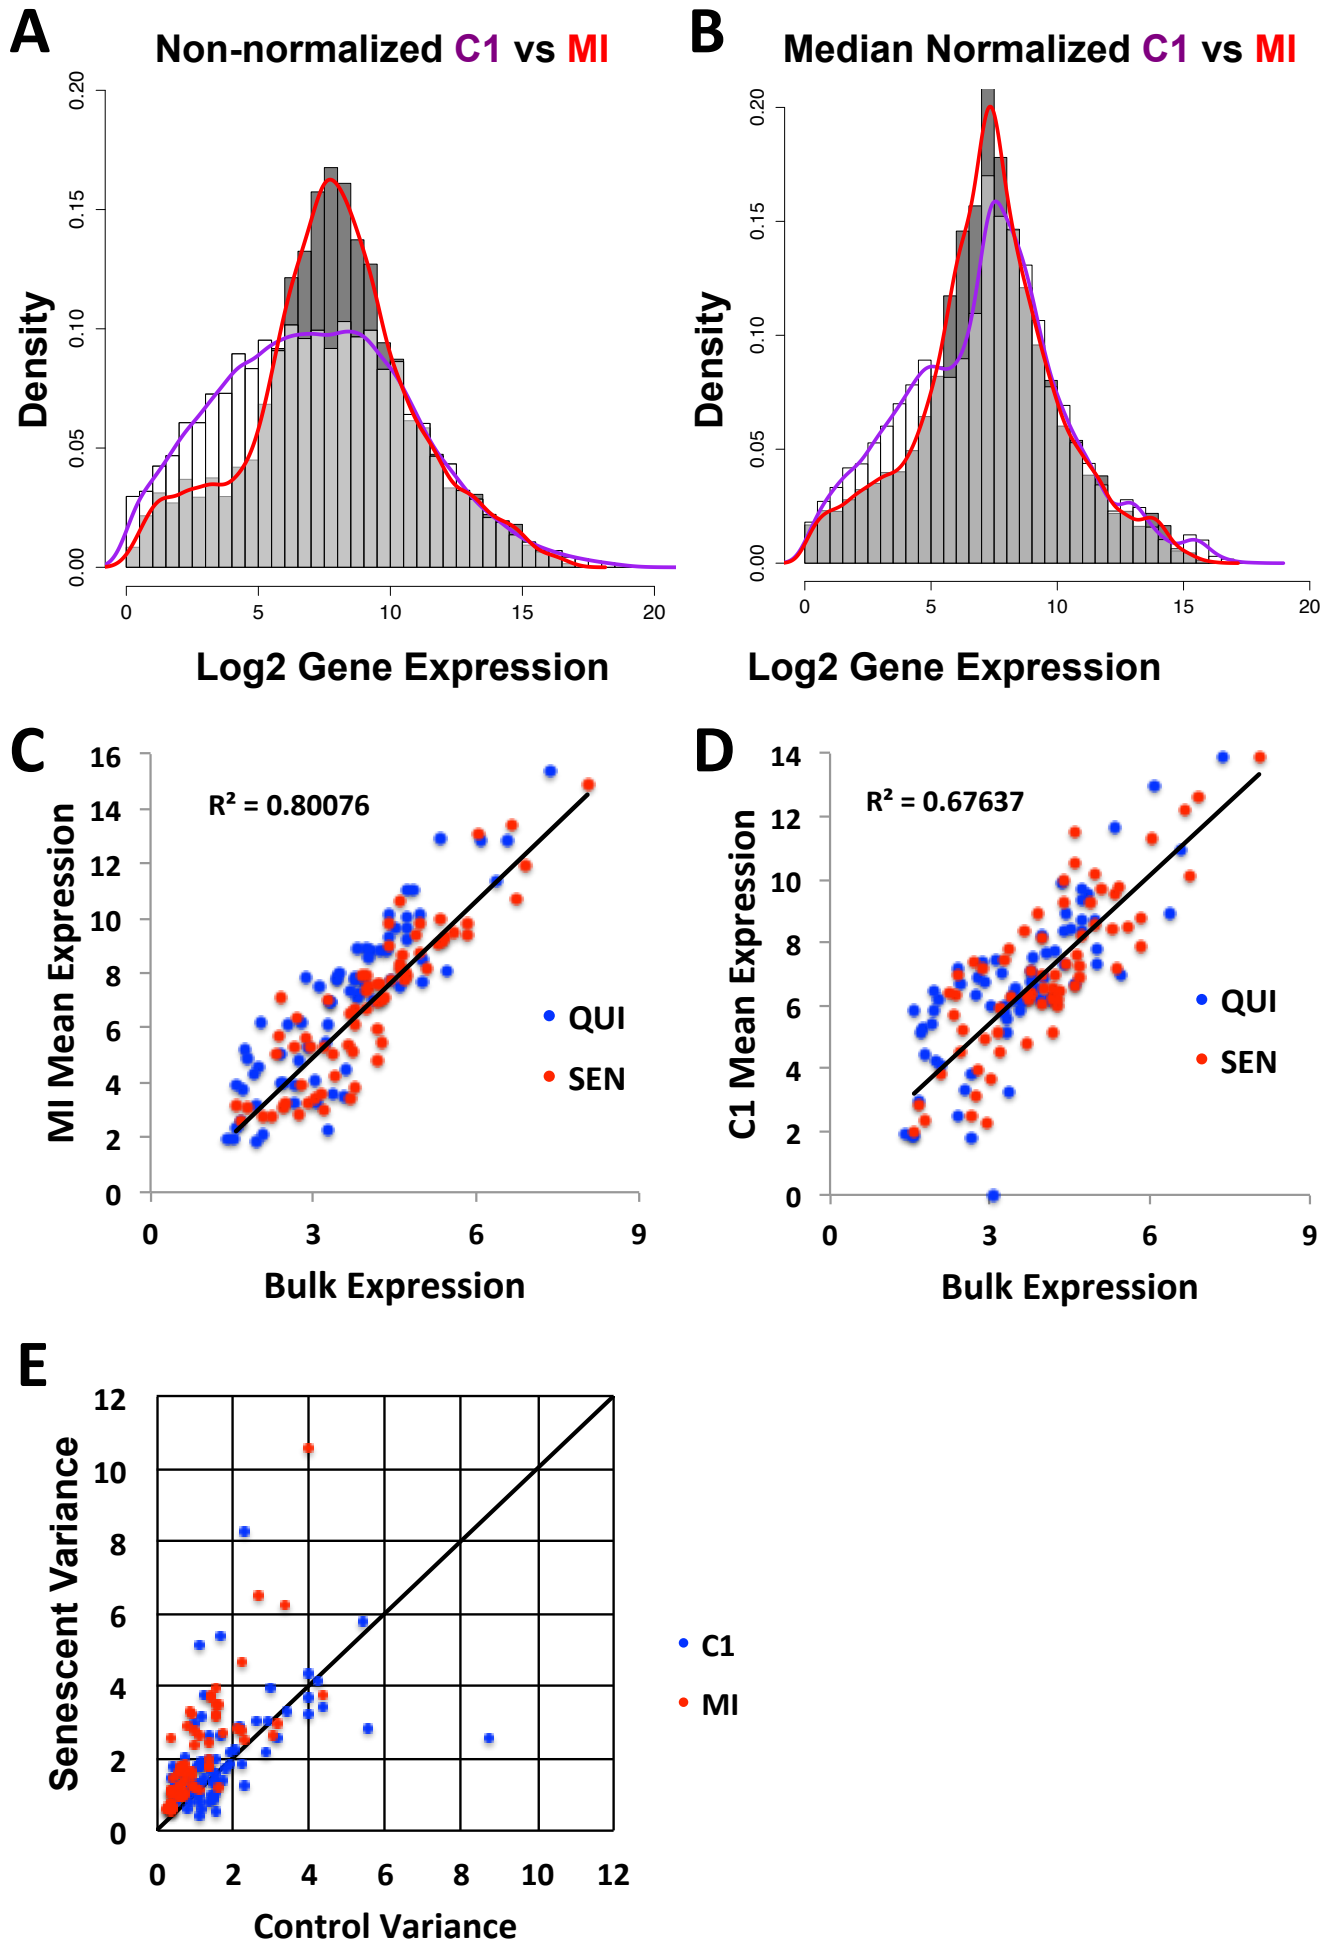

# Figure S4

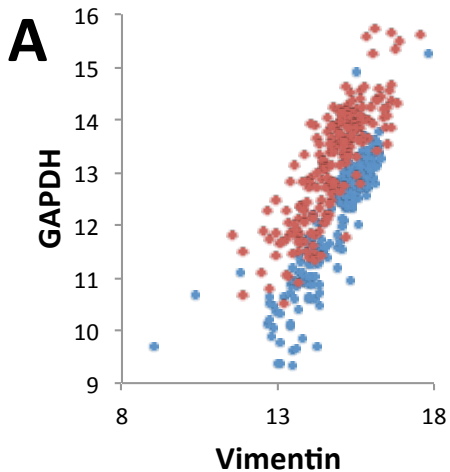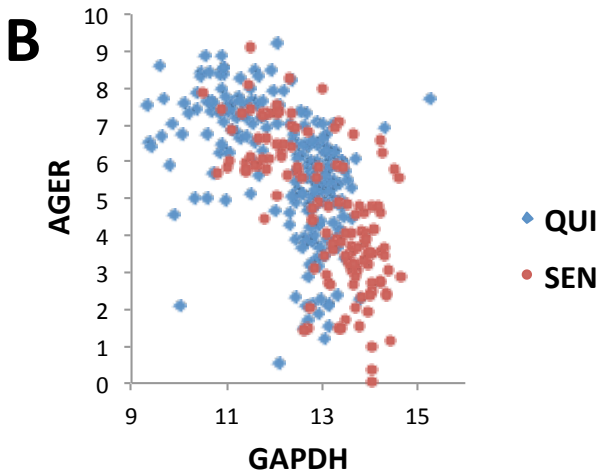

# Figure S5

## Class 1 pathways

| Pathway name                                                        | Entities pValue | Entities FDR | Submitted entities found                                     |
|---------------------------------------------------------------------|-----------------|--------------|--------------------------------------------------------------|
| Activation of Matrix Metalloproteinases                             | 1.11E-16        | 1.48E-14     | MMP2;TIMP2                                                   |
| Degradation of the extracellular matrix                             | 1.11E-16        | 1.48E-14     | COL1A1;MMP2;TIMP2                                            |
| Collagen degradation                                                | 1.11E-16        | 1.48E-14     | COL1A1;MMP2                                                  |
| Extracellular matrix organization                                   | 1.11E-13        | 1.11E-11     | COL1A1;MMP2;TIMP2                                            |
| Interleukin-4 and 13 signaling                                      | 3.64E-11        | 2.91E-09     | IL6;MMP2;VIM;HIF1A;VEGFA                                     |
| Cellular responses to stress                                        | 7.07E-09        | 4.66E-07     | EGLN1;HSPA9;RB1;IL6;CAT;IGFBP7;VHL;SOD2;HIF1A;VEGFA          |
| Cellular responses to external stimuli                              | 5.12E-08        | 2.92E-06     | EGLN1;HSPA9;RB1;IL6;CAT;IGFBP7;VHL;SOD2;HIF1A;VEGFA          |
| Signaling by Interleukins                                           | 3.20E-07        | 1.60E-05     | FGF7;IL6;MMP2;VIM;VHL;HIF1A;VEGFA                            |
| Immune System                                                       | 5.19E-06        | 2.18E-04     | COL1A1;IL6;FGF7;MMP2;CAT;TIMP2;PTEN;VHL;VIM;HIF1A;PDK1;VEGFA |
| Cytokine Signaling in Immune system                                 | 5.46E-06        | 2.18E-04     | FGF7;IL6;MMP2;VIM;VHL;HIF1A;VEGFA                            |
| Assembly of collagen fibrils and other multimeric structures        | 7.38E-06        | 2.66E-04     | COL1A1;MMP2                                                  |
| Regulation of Hypoxia-inducible Factor (HIF) by oxygen              | 2.17E-05        | 6.52E-04     | EGLN1;VHL;HIF1A;VEGFA                                        |
| Cellular response to hypoxia                                        | 2.17E-05        | 6.52E-04     | EGLN1;VHL;HIF1A;VEGFA                                        |
| Regulation of gene expression by Hypoxia-inducible Factor           | 3.83E-05        | 1.07E-03     | HIF1A;VEGFA                                                  |
| Collagen formation                                                  | 5.96E-05        | 1.55E-03     | COL1A1;MMP2                                                  |
| Cellular Senescence                                                 | 1.36E-04        | 3.41E-03     | RB1;IL6;IGFBP7                                               |
| Regulation of Insulin-like Growth Factor (IGF) transport and uptake | 1.51E-04        | 3.47E-03     | IL6;MMP2;IGFBP2;IGFBP7                                       |
| PIP3 activates AKT signaling                                        | 3.15E-04        | 4.82E-03     | FGF7;PTEN;PDK1                                               |
| PI3K/AKT activation                                                 | 3.44E-04        | 4.82E-03     | FGF7;PTEN;PDK1                                               |
| GAB1 signalosome                                                    | 3.44E-04        | 4.82E-03     | FGF7;PTEN;PDK1                                               |
| Senescence-Associated Secretory Phenotype (SASP)                    | 4.41E-04        | 6.18E-03     | IL6;IGFBP7                                                   |
| Downstream signaling events of B Cell Receptor (BCR)                | 1.97E-03        | 2.56E-02     | FGF7;PTEN;PDK1                                               |
| Oxygen-dependent proline hydroxylation of HIF1-Alpha                | 2.76E-03        | 3.41E-02     | EGLN1;VHL;HIF1A                                              |
| Role of LAT2/NTAL/LAB on calcium mobilization                       | 2.84E-03        | 3.41E-02     | FGF7;PTEN;PDK1                                               |
| Pink/Parkin Mediated Mitophagy                                      | 3.52E-03        | 4.23E-02     | MFN1;MFN2                                                    |

## Class 2 pathways

| Pathway name                                                        | Entities pValue | Entities FDR | Submitted entities found |
|---------------------------------------------------------------------|-----------------|--------------|--------------------------|
| Chemokine receptors bind chemokines                                 | 1.15E-08        | 1.38E-06     | IL8;CXCL2;CXCL5          |
| Interleukin-10 signaling                                            | 2.29E-07        | 1.37E-05     | IL8;PTGS2;CXCL2          |
| Peptide ligand-binding receptors                                    | 1.07E-05        | 4.29E-04     | IL8;CXCL2;CXCL5          |
| Interleukin-4 and 13 signaling                                      | 1.64E-05        | 4.92E-04     | SOCS3;IL8;PTGS2          |
| Signaling by Interleukins                                           | 5.81E-05        | 1.16E-03     | SOCS3;IL8;PTGS2;CXCL2    |
| Unfolded Protein Response (UPR)                                     | 1.04E-04        | 1.77E-03     | IL8;LMNA                 |
| G alpha (i) signalling events                                       | 1.31E-04        | 1.97E-03     | IL8;CXCL2;CXCL5          |
| Class A/1 (Rhodopsin-like receptors)                                | 3.28E-04        | 3.28E-03     | IL8;CXCL2;CXCL5          |
| Cytokine Signaling in Immune system                                 | 6.12E-04        | 4.90E-03     | SOCS3;IL8;PTGS2;CXCL2    |
| Regulation of Insulin-like Growth Factor (IGF) transport and uptake | 1.00E-03        | 8.00E-03     | IGFBP4;IGFBP6;CYR61      |
